# Supplementary material for: A triterpenoidal saponin fraction of Conyza blinii H.Lév. is a dual-targeting autophagy inhibitor for HeLa cells
Source: Royal Society of Chemistry journal article supplement (doi:10.1039/c7ra02626a), 2017-01-01
Supplement: c7ra02626a1.pdf [file c7ra02626a1.pdf]

## Supplementary Information

### A triterpenoidal saponin fraction of *Conyza blinii* H.Lév. is a dual-targeting autophagy inhibitor for HeLa cells

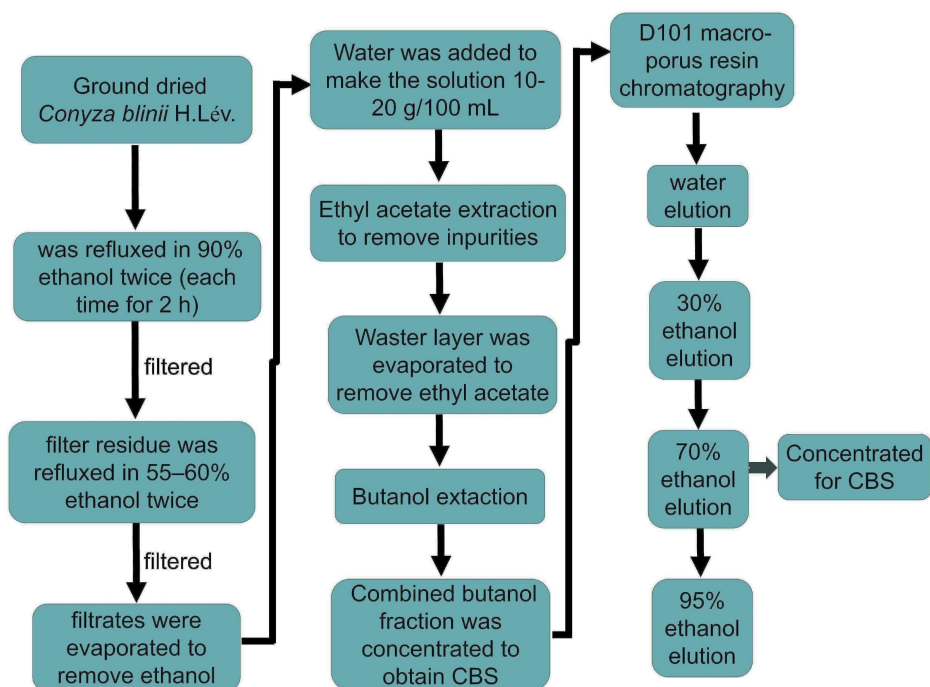

Figure SI-1: Flow chart for preparing CBS.

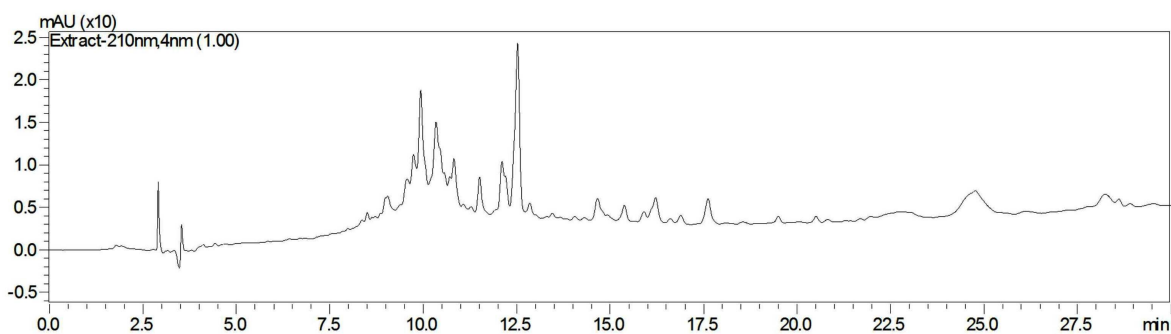

Figure SI-2. HPLC profile of CBS sample.

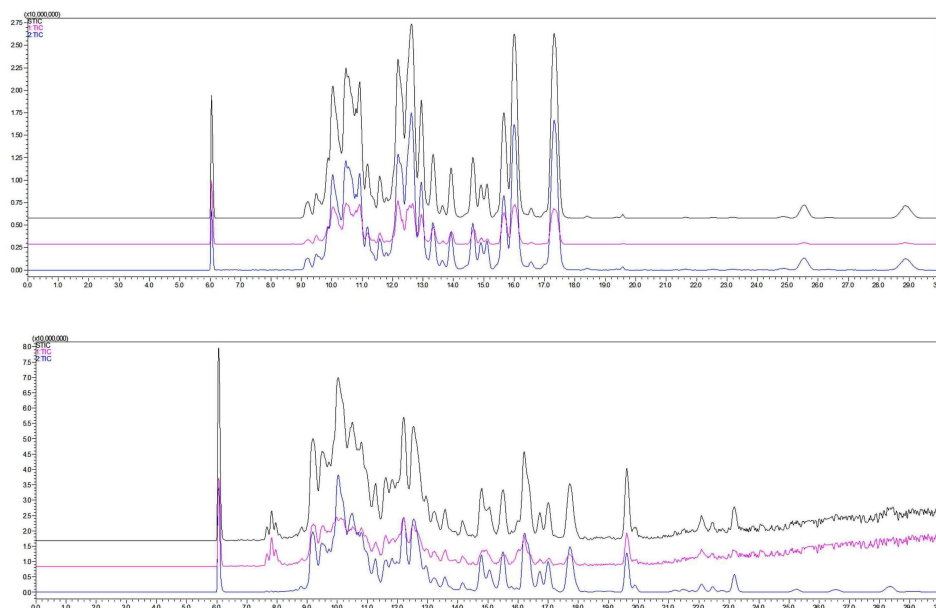

**Figure SI-3. Positive and negative mass spectrometric TIC (total ion chromatography) profiles of CBS.** The upper one has a  $m/z$  range from 1300 to 1700; the lower one has a  $m/z$  range from 700 to 1400.

| <b>Conyzasaponin</b> | <b>Chemical component</b>                                                                                                                                                                                                                                                                                                                                                              |
|----------------------|----------------------------------------------------------------------------------------------------------------------------------------------------------------------------------------------------------------------------------------------------------------------------------------------------------------------------------------------------------------------------------------|
| <b>A</b>             | 3-O- $\beta$ -D-xylopyranosyl-(1 $\rightarrow$ 3)- $\beta$ -D-glucopyranosyl bayogenine<br>28-O- $\beta$ -D-apiofuranosyl-(1 $\rightarrow$ 3)- $\beta$ -D-xylopyranosyl-(1 $\rightarrow$ 4)- $\alpha$ -R-L-rhamnopyranosyl-(1 $\rightarrow$ 2)- $\alpha$ -L-arabinopyranosyl ester                                                                                                     |
| <b>B</b>             | 3-O- $\beta$ -D-xylopyranosyl-(1 $\rightarrow$ 3)- $\beta$ -D-glucopyranosyl bayogenine<br>28-O- $\beta$ -D-apiofuranosyl-(1 $\rightarrow$ 3)- $\beta$ -D-xylopyranosyl-(1 $\rightarrow$ 4)-[R-L-arabinopyranosyl-(1 $\rightarrow$ 3)]- $\alpha$ -L-rhamnopyranosyl-(1 $\rightarrow$ 2)- $\alpha$ -L-arabinopyranosyl ester                                                            |
| <b>C</b>             | 3-O- $\beta$ -D-xylopyranosyl-(1 $\rightarrow$ 3)- $\beta$ -D-glucopyranosyl bayogenine<br>28-O- $\alpha$ -L-rhamnopyranosyl-(1 $\rightarrow$ 3)- $\beta$ -D-xylopyranosyl-(1 $\rightarrow$ 4)-[ $\beta$ -D-apiofuranosyl-(1 $\rightarrow$ 3)]- $\alpha$ -L-rhamnopyranosyl-(1 $\rightarrow$ 2)- $\alpha$ -L-arabinopyranosyl ester                                                    |
| <b>D</b>             | 3-O- $\beta$ -D-xylopyranosyl-(1 $\rightarrow$ 3)- $\beta$ -D-glucopyranosyl polygalacic acid-28-O- $\beta$ -D-galactopyranosyl-(1 $\rightarrow$ 2)- $\beta$ -D-apiofuranosyl-(1 $\rightarrow$ 3)- $\beta$ -D-xylopyranosyl-(1 $\rightarrow$ 4)-[ $\beta$ -D-apiofuranosyl-(1 $\rightarrow$ 3)]- $\alpha$ -L-rhamnopyranosyl-(1 $\rightarrow$ 2)- $\alpha$ -L-arabinopyranosyl ester   |
| <b>E</b>             | 3-O- $\beta$ -D-xylopyranosyl-(1 $\rightarrow$ 3)- $\beta$ -D-glucopyranosyl polygalacic acid-28-O- $\beta$ -D-galactopyranosyl-(1 $\rightarrow$ 2)- $\beta$ -D-apiofuranosyl-(1 $\rightarrow$ 3)- $\beta$ -D-xylopyranosyl-(1 $\rightarrow$ 4)-[ $\alpha$ -arabinopyranosyl-(1 $\rightarrow$ 3)]- $\alpha$ -L-rhamnopyranosyl-(1 $\rightarrow$ 2)- $\alpha$ -L-arabinopyranosyl ester |
| <b>F</b>             | 3-O- $\beta$ -D-glucopyranosyl polygalacic acid<br>28-O- $\beta$ -D-galactopyranosyl-(1 $\rightarrow$ 2)- $\beta$ -D-apiofuranosyl-(1 $\rightarrow$ 3)- $\beta$ -D-xylopyranosyl-(1 $\rightarrow$ 4)-[ $\beta$ -D-apiofuranosyl-(1 $\rightarrow$ 3)]- $\alpha$ -L-rhamnopyranosyl-(1 $\rightarrow$ 2)- $\alpha$ -L-arabinopyranosyl ester                                              |

|            |                                                                                                                                                                                                              |
|------------|--------------------------------------------------------------------------------------------------------------------------------------------------------------------------------------------------------------|
| <b>H</b>   | 3-O-β-D-xylopyranosyl-(1→3)-β-D-glucopyranosyl polygalactic acid<br>28-O-β-D-galactopyranosyl-(1→2)-β-D-apiofuranosyl-(1→3)-β-D-xylopyranosyl-(1→4)-α-L-rhamnopyranosyl-(1→2)-α-L-arabinopyranosyl ester     |
| <b>I</b>   | 3-O-β-D-xylopyranosyl-(1→3)-β-D-glucopyranosyl bayogenin<br>28-O-α-L-rhamnopyranosyl-(1→3)-β-D-xylopyranosyl-(1→4)-α-L-rhamnopyranosyl-(1→2)-α-L-arabinopyranosyl ester                                      |
| <b>J</b>   | 3-O-β-D-xylopyranosyl-(1→3)-β-D-glucopyranosyl polygalactic acid<br>28-O-α-L-rhamnopyranosyl-(1→3)-β-D-xylopyranosyl-(1→4)-α-L-rhamnopyranosyl-(1→2)-α-L-arabinopyranosyl ester                              |
| <b>K</b>   | 3-O-β-D-xylopyranosyl-(1→3)-β-D-glucopyranosyl polygalactic acid<br>28-O-α-L-rhamnopyranosyl-(1→3)-β-D-xylopyranosyl-(1→4)-[β-D-apiofuranosyl-(1→3)]-α-L-rhamnopyranosyl-(1→2)-α-L-arabinopyranosyl ester    |
| <b>L</b>   | 3-O-β-D-xylopyranosyl-(1→3)-β-D-glucopyranosyl polygalactic acid<br>28-O-α-D-galactopyranosyl-(1→2)-α-L-rhamnopyranosyl-(1→3)-β-D-xylopyranosyl-(1→24)-α-L-rhamnopyranosyl-(1→2)-α-L-arabinopyranosyl ester. |
| <b>M/Q</b> | 3-O-β-D-xylopyranosyl-(1→3)-β-D-glucopyranosyl bayogenin<br>28-O-β-D-apiofuranosyl-(1→3)-β-D-xylopyranosyl-(1→4)-[β-D-apiofuranosyl-(1→3)]-α-L-rhamnopyranosyl-(1→2)-α-L-arabinopyranosyl ester.             |
| <b>N</b>   | 3-O-β-D-glucopyranosyl bayogenin<br>28-O-β-D-apiofuranosyl-(1→3)-α-D-xylopyranosyl-(1→4)-[β-D-apiofuranosyl-(1→3)]-α-L-rhamnopyranosyl-(1→2)-α-L-arabinopyranosyl ester.                                     |
| <b>O</b>   | 3-O-β-D-glucopyranosyl-(1→3)-β-D-glucopyranosyl bayogenin<br>28-O-β-D-apiofuranosyl-(1→3)-β-D-xylopyranosyl-(1→4)-[β-D-apiofuranosyl-(1→3)]-α-L-rhamnopyranosyl-(1→2)-α-L-arabinopyranosyl ester             |
| <b>P</b>   | 3-O-β-D-xylopyranosyl-(1→3)-β-D-glucopyranosyl bayogenin<br>28-O-β-D-apiofuranosyl-(1→3)-[β-D-xylopyranosyl-(1→4)]-α-L-rhamnopyranosyl-(1→2)-α-L-arabinopyranosyl ester                                      |

**Table SI-1. Chemical components in CBS.**

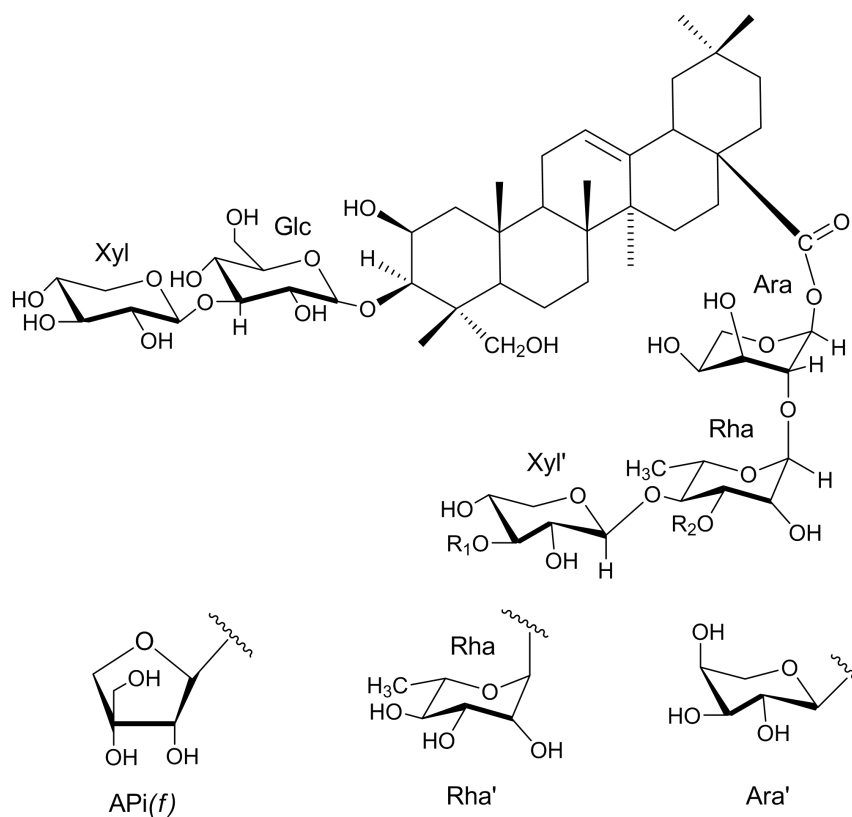

|                 | $\text{R}_1$             | $\text{R}_2$             |
|-----------------|--------------------------|--------------------------|
| Conyzasaponin A | $\text{A}\pi\text{i}(f)$ | H                        |
| Conyzasaponin B | $\text{A}\pi\text{i}(f)$ | $\text{Ara}'$            |
| Conyzasaponin C | $\text{Rha}'$            | $\text{A}\pi\text{i}(f)$ |

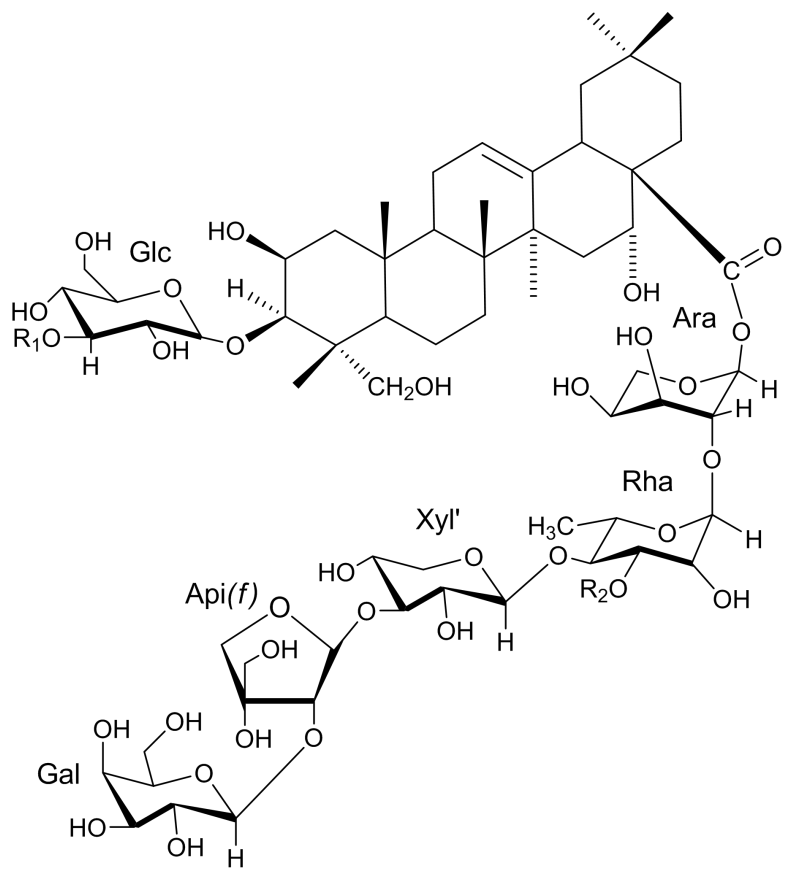

|                 | R <sub>1</sub> | R <sub>2</sub>   |
|-----------------|----------------|------------------|
| Conyzasaponin D | Xyl            | Api( <i>f</i> )' |
| Conyzasaponin E | Xyl            | Ara'             |
| Conyzasaponin F | H              | Api( <i>f</i> )' |
| Conyzasaponin H | Xyl            | H                |

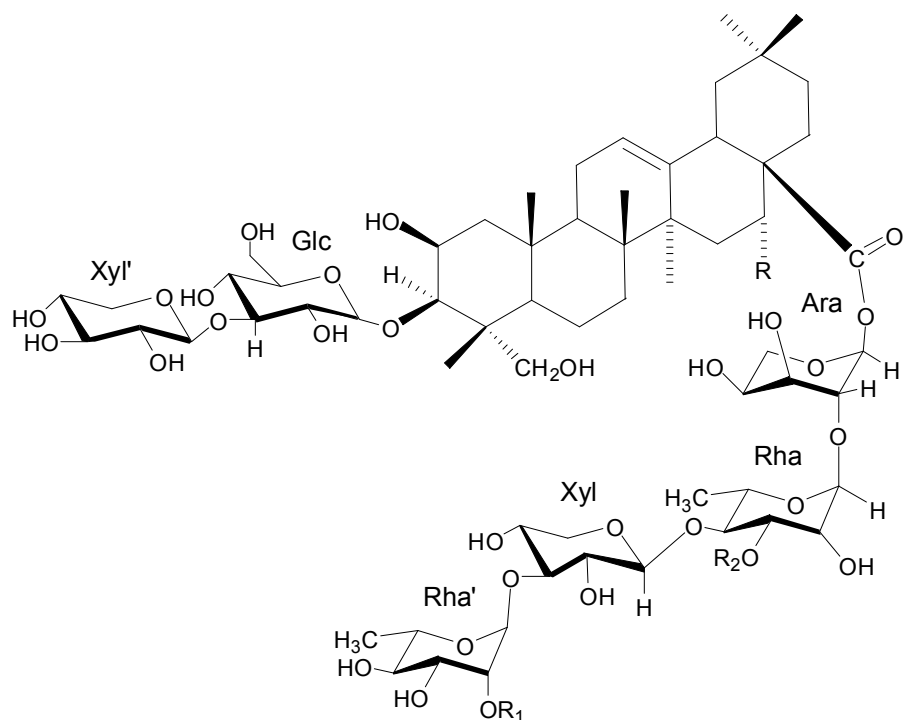

|                 | R  | R <sub>1</sub> | R <sub>2</sub>  |
|-----------------|----|----------------|-----------------|
| Conyzasaponin I | H  | H              | H               |
| Conyzasaponin J | OH | H              | H               |
| Conyzasaponin K | OH | H              | Api( <i>f</i> ) |
| Conyzasaponin L | OH | Gal            | H               |

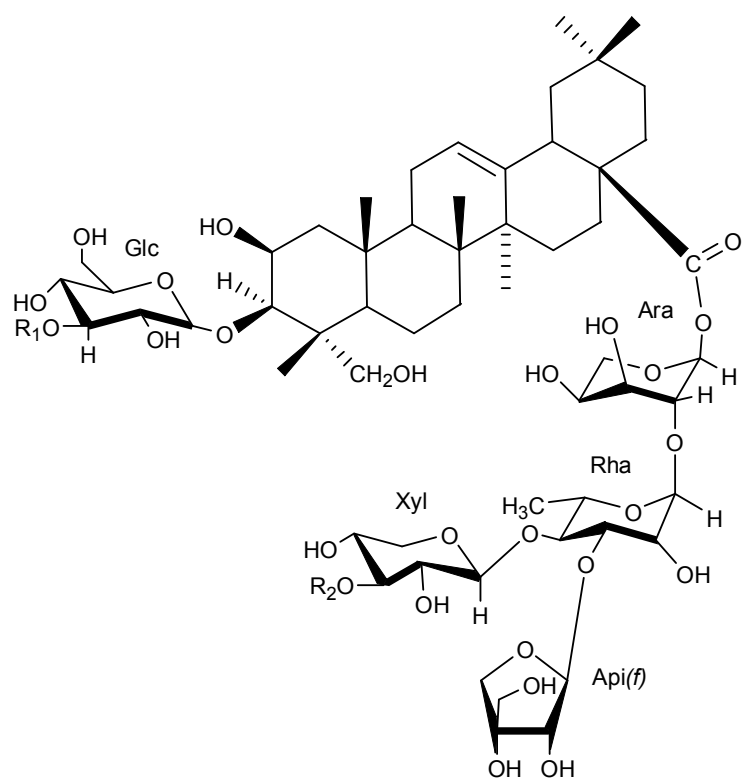

|                 | R <sub>1</sub> | R <sub>2</sub>   |
|-----------------|----------------|------------------|
| Conyzasaponin M | Xyl'           | Api( <i>f</i> )' |
| Conyzasaponin N | H              | Api( <i>f</i> )' |
| Conyzasaponin O | Glc'           | Api( <i>f</i> )' |
| Conyzasaponin P | Xyl'           | H                |
| Conyzasaponin Q | Xyl'           | Xyl''            |

**Figure SI-4. Chemical structures of components in CBS.**
